# Supplementary material for: Absolute quantification of redox state of cytochrome c oxidase and hemoglobin in human tissue using continuous-wave broadband near-infrared spectroscopy
Source: Research Square preprint supplement (doi:10.21203/rs.3.rs-7760901/v1), 2025-10-05
Supplement: Supplementary file 1 [file bf186e160673295e0419988c.docx]

supplemental document


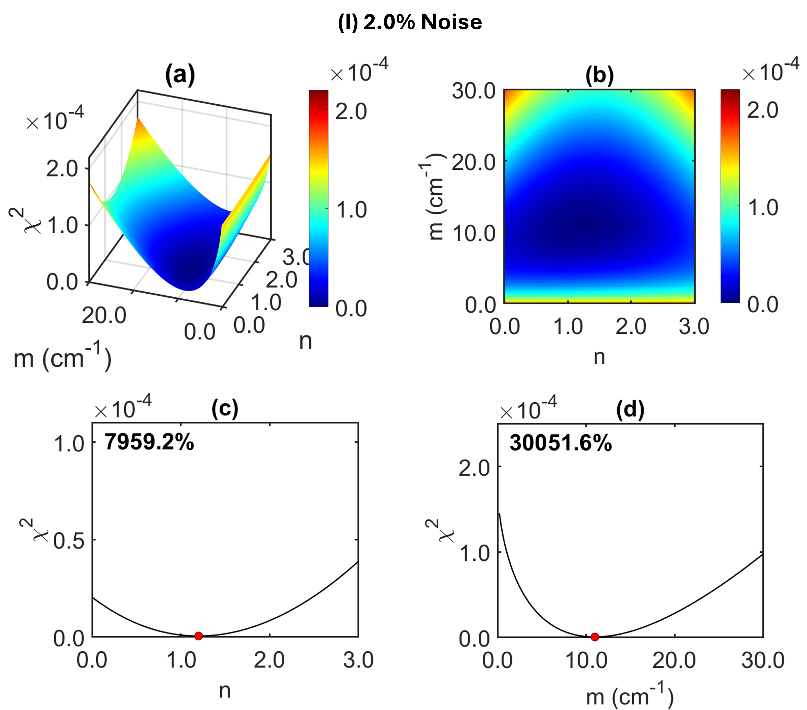


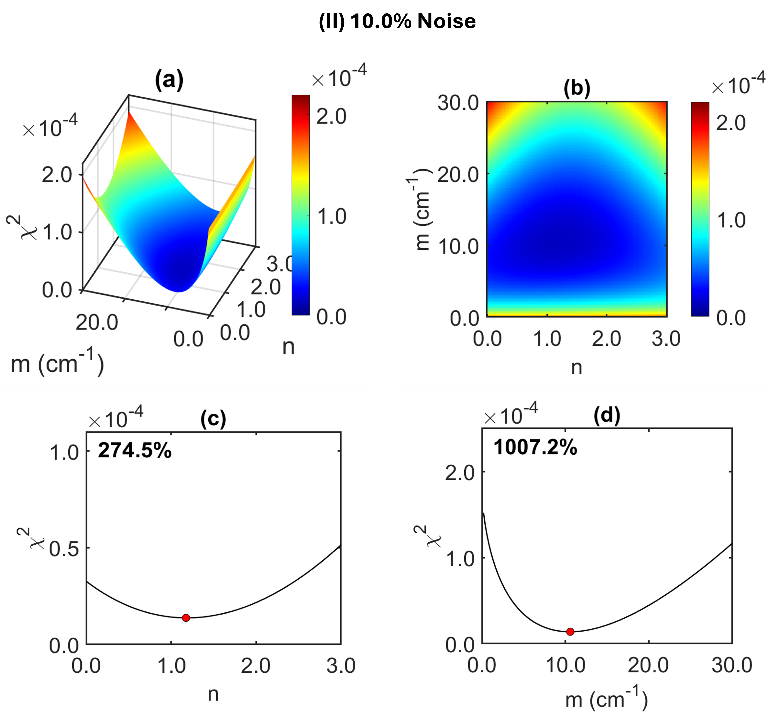


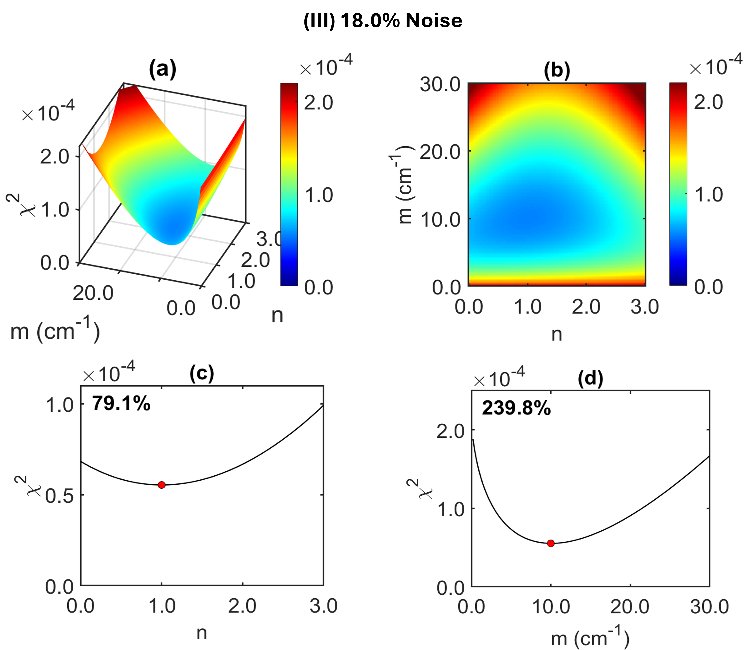


Fig. S1. Effect of noise levels on cost function () and identifiability of scattering parameters . is shown for scattering amplitude (0–30 cm-1) and scattering power (0–3) at (I) 2.0%, (II) 10.0%, and (III) 18.0% multiplicative noise. Panel (a) displays the 3D surface; (b) shows the corresponding 2D heatmap (same color scale as (a)); (c) plots versus evaluated at the that minimizes ; and (d) plots versus evaluated at the that minimizes . Red dots mark slice minima; larger colors/values indicate poorer fits. As noise increases, the landscape broadens and flattens, most prominently along , reducing the distinctness of local minima and degrading identifiability of , while remains comparatively well constrained. (Numbers in (c–d) report slice “contrast,” (max−min)/min×100%, as a simple measure of basin depth.)
